# Supplementary material
Source: publisher figshare collection journal article supplement (https://frontiersin.figshare.com/ndownloader/files/16973798)
Supplement: Supplementary file [file 16973798]

# SUPPORTING INFORMATION

## Enhanced Energy Conversion of Z907-Based Solar Cells by Cucurbit[7]uril Macrocycles

Hmoud Al-Dmour,<sup>‡</sup> Reem H. Alzard,<sup>§</sup> Hamda Alblooshi,<sup>§</sup> Khaula Alhosani,<sup>§</sup> Shaqra AlMadhoob,<sup>§</sup> and Na'il Saleh\*<sup>§</sup>

<sup>‡</sup>*Department of Physics, Faculty of Science, Mu'tah University, Mu'tah, 61710, Jordan.*

<sup>§</sup>*Chemistry Department, College of Science, United Arab Emirates University, P.O. Box 15551, Al Ain, United Arab Emirates*

## TABLE OF CONTENTS

|                                                     |           |
|-----------------------------------------------------|-----------|
| <b>Part 1: Titrations.....</b>                      | <b>S3</b> |
| Titration by UV–vis absorption method. ....         | S3        |
| Titration by NMR method. ....                       | S5        |
| <b>Part 2: Excitation spectra in solution .....</b> | <b>S4</b> |
| Excitation spectra.....                             | S4        |
| Excitation-dependence emission spectra .....        | S4        |
| <b>Part 3: FTIR Spectra .....</b>                   | <b>S6</b> |
| <b>Part 4: TRPL measurements .....</b>              | <b>S7</b> |
| Emission decays in solution .....                   | S7        |
| Emission decays on electrodes .....                 | S8        |

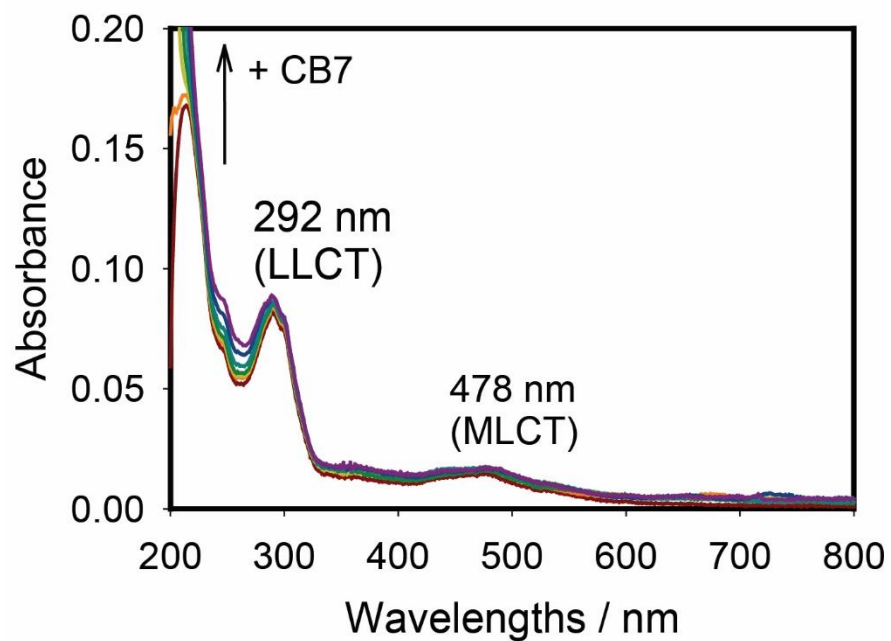

**Figure S1.** UV-vis absorption bands of Z907 (30  $\mu$ M) in acetonitrile and water (1:9 v/v) in the absence and presence of 0–50 equivalents CB7. No changes were observed.

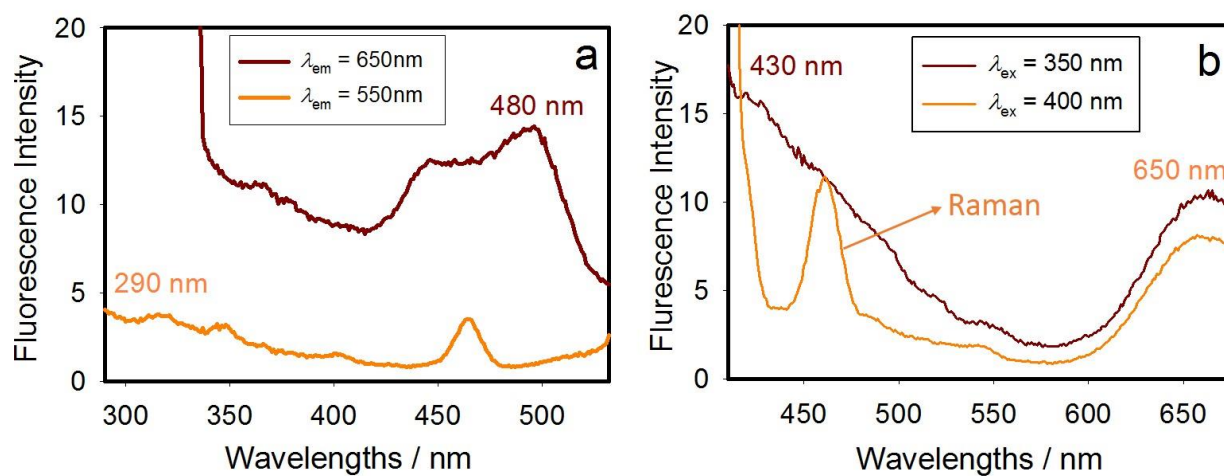

**Figure S2.** Excitation spectra (a) monitored at 550 and 650 nm of Z907 (30  $\mu\text{M}$ ) in in acetonitrile and water (1:9 v/v). And excitation-dependence emission spectra (b) at 350 and 400 nm of Z907 (30  $\mu\text{M}$ ) in in acetonitrile and water (1:9 v/v).

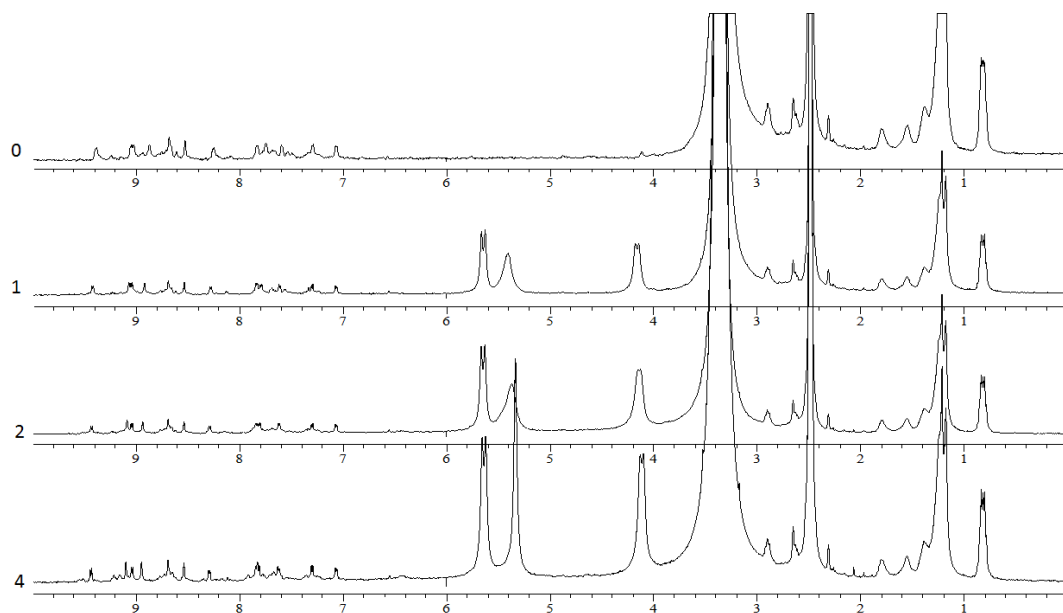

**Figure S3.**  $^1\text{H}$ -NMR titration of Z907 (1.0 mM) in  $\text{DMSO-d}_6$  in the absence and presence of 0–4 equivalents CB7. No changes were observed.

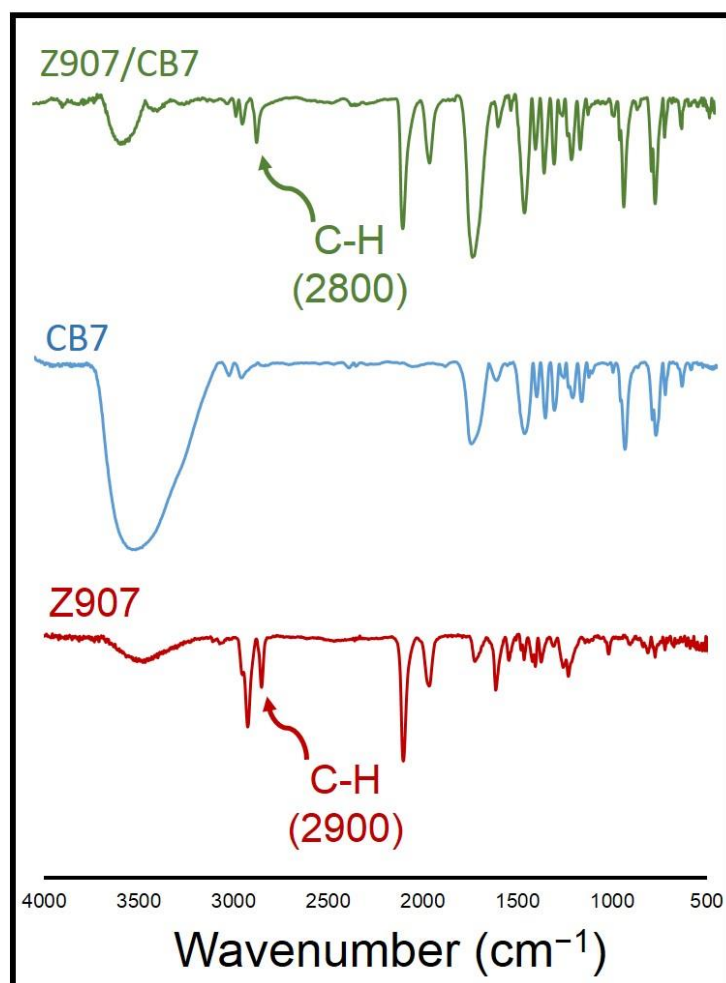

**Figure S4.** FTIR spectra of Z907, CB7 and their solid complex in KBr disk.

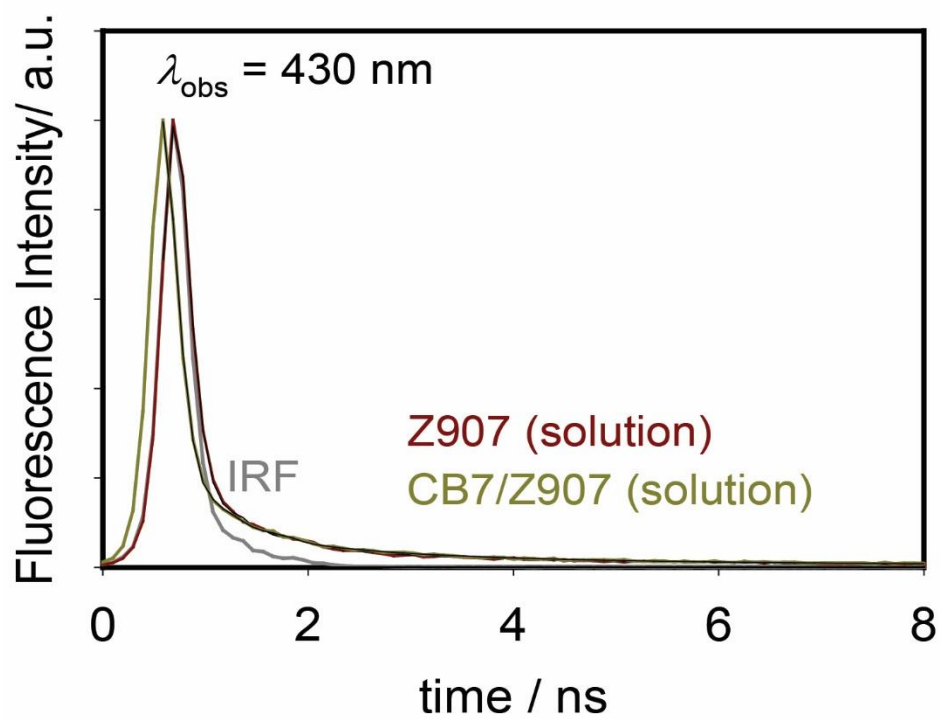

**Figure S5.** Emission decays monitored at 430 nm for Z907 (30  $\mu\text{M}$ ) in acetonitrile/water (1:9 v/v, pH 7) and inside CB7 (10 equivalents) upon excitation at 375 nm and room temperature.

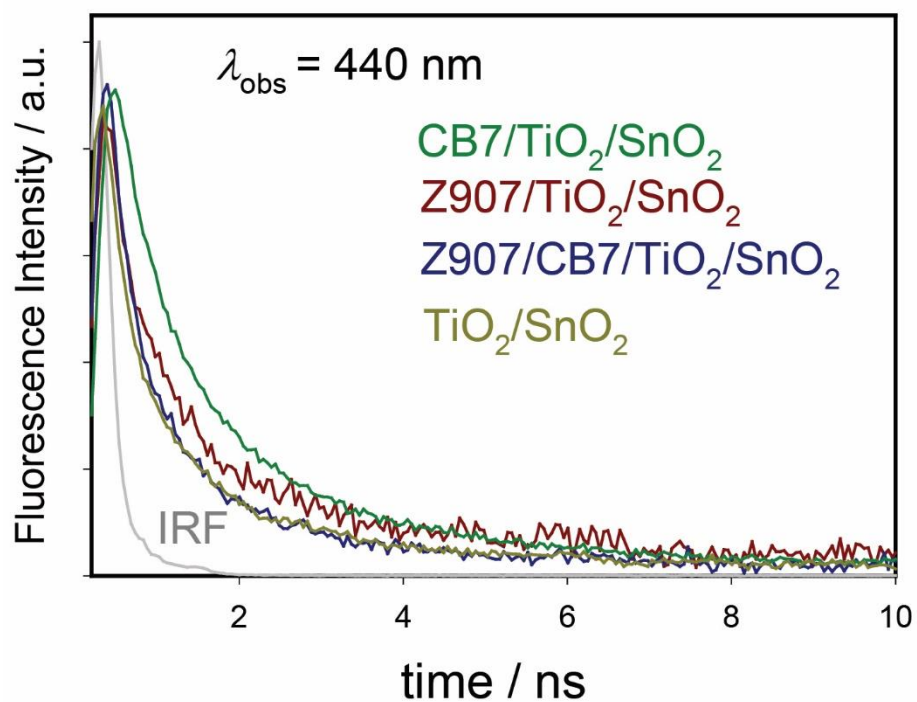

**Figure S6.** Emission decays at 440 nm of  $\text{Z907/TiO}_2/\text{SnO}_2$  and  $\text{Z907/CB7/TiO}_2/\text{SnO}_2$  electrodes along with CB7-coated and uncoated  $\text{TiO}_2/\text{SnO}_2$  electrodes.
